# Supplementary material
Source: PubMed Central journal article supplement (PMC2085367)
Supplement: NIHMS27393-supplement-supplement_1.pdf [file NIHMS27393-supplement-supplement_1.pdf]

Supplementary Table I. Number of non-Hodgkin lymphoma cases and controls and odds ratios by hair dye use before 1980, *NAT2* phenotype, and *NAT1* genotype (women only).

|                          | Cases | Controls        | OR <sup>a</sup> (95% CI) | Cases | Controls                | OR <sup>a</sup> (95% CI) |
|--------------------------|-------|-----------------|--------------------------|-------|-------------------------|--------------------------|
| <i>NAT2</i>              |       | No hair dye use |                          |       | Permanent dye (any)     |                          |
| Slow                     | 37    | 38              | 1.0 (referent)           | 68    | 48                      | 1.3 (0.7,2.4)            |
| Rapid/intermediate       | 32    | 41              | 0.7 (0.4,1.4)            | 58    | 37                      | 1.6 (0.8,3.1)            |
| <i>NAT2</i>              |       | No hair dye use |                          |       | Permanent dark colors   |                          |
| Slow                     | 37    | 38              | 1.0 (referent)           | 45    | 26                      | 1.6 (0.8,3.3)            |
| Rapid/intermediate       | 32    | 41              | 0.7 (0.4,1.5)            | 36    | 25                      | 1.6 (0.8,3.3)            |
| <i>NAT2</i>              |       | No hair dye use |                          |       | Permanent intense tones |                          |
| Slow                     | 37    | 38              | 1.0 (referent)           | 23    | 14                      | 1.6 (0.7,3.8)            |
| Rapid/intermediate       | 32    | 41              | 0.8 (0.4,1.5)            | 25    | 11                      | 2.2 (0.9,5.4)            |
| <i>NAT1</i>              |       | No hair dye use |                          |       | Permanent dye (any)     |                          |
| <i>Any/any</i>           | 45    | 42              | 1.0 (referent)           | 65    | 53                      | 1.1 (0.6,1.9)            |
| <i>*10/any + *10/*10</i> | 23    | 30              | 0.8 (0.4,1.6)            | 58    | 29                      | 2.2 (1.1,4.2)            |
| <i>NAT1</i>              |       | No hair dye use |                          |       | Permanent dark colors   |                          |
| <i>Any/any</i>           | 45    | 42              | 1.0 (referent)           | 38    | 32                      | 1.1 (0.6,2.1)            |
| <i>*10/any + *10/*10</i> | 23    | 30              | 0.8 (0.4,1.6)            | 33    | 18                      | 2.1 (0.99,4.7)           |
| <i>NAT1</i>              |       | No hair dye use |                          |       | Permanent intense tones |                          |
| <i>Any/any</i>           | 45    | 42              | 1.0 (referent)           | 26    | 16                      | 1.5 (0.7,3.3)            |
| <i>*10/any + *10/*10</i> | 23    | 30              | 0.8 (0.4,1.7)            | 22    | 10                      | 2.2 (0.9,5.6)            |

<sup>a</sup> Odds ratio (95% CI), adjusted for age, race, and SEER area.
